# Supplementary material for: Vegetation Cover Change Detection and Assessment in Arid Environment Using Multi-temporal Remote Sensing images and Ecosystem Management Approach
Source: Copernicus journal article supplement (doi:10.5194/se-2016-31), 2016-02-25
Supplement: Supplementary file [file se-2016-31-AC4-supplement.pdf]

**Table 1.** Spatio-temporal characteristics of Al-Kharj ecosystem

| Reference<br>Year | Classified<br>image | Vegetation cover areas (Km <sup>2</sup> ) |                                 |                         | Total |
|-------------------|---------------------|-------------------------------------------|---------------------------------|-------------------------|-------|
|                   |                     | Dense<br>(NDVI > 0.5)                     | Moderate<br>(NDVI = 0.25 – 0.5) | Sparse<br>(NDVI < 0.25) |       |
| 1987              | Landsat4<br>TM      | 36                                        | 69                              | 58                      | 163   |
| 2000              | Landsat7<br>ETM+    | 8                                         | 156                             | 174                     | 338   |
| 2013              | Landsat8            | 6                                         | 91                              | 148                     | 245   |
