# Supplementary material for: Vegetation Cover Change Detection and Assessment in Arid Environment Using Multi-temporal Remote Sensing images and Ecosystem Management Approach
Source: Copernicus journal article supplement (doi:10.5194/se-2016-31), 2016-02-25
Supplement: Supplementary file [file se-2016-31-AC6-supplement.pdf]

# Vegetation Cover Change Detection and Assessment in Arid Environment Using Multi-temporal Remote Sensing images and Ecosystem Management Approach

Anwar Abdelrahman Aly<sup>1,3</sup>, Abdulrasoul Mosa Al-Omran<sup>\*1</sup>, Abdulazeam Shahwan Sallam<sup>1</sup>, Mohammad Ibrahim Al-Wabel<sup>1</sup>, Mohammad Shayaa Al-Shayaa<sup>2</sup>

<sup>1</sup>Soil Science Dept., King Saud University, Riyadh, Saudi Arabia

<sup>2</sup>Agricultural Extension and Rural Community Dept., King Saud University, Riyadh, Saudi Arabia

<sup>3</sup>Soil and Water Science Dept., Faculty of Agric., Alexandria University, Egypt

\*Corresponding Author: Tel: +966114678444; Fax: +966114678440

Email: [rasoul@ksu.edu.sa](mailto:rasoul@ksu.edu.sa); [anwarsiwa@yahoo.com](mailto:anwarsiwa@yahoo.com)

## Abstract

Vegetation cover (VC) changes detection is essential for a better understanding of the interactions and interrelationships between humans and their ecosystem. Remote sensing (RS) technology is one of the most beneficial tools to study spatial and temporal changes of VC. A case study has been conducted in the agro-ecosystem (AE) of Al-Kharj, in the centre of Saudi Arabia. Characteristics and dynamics of total VC changes during a period of 26 years (1987 - 2013) were investigated. A multi-temporal set of images was processed using Landsat images; Landsat4 TM 1987, Landsat7 ETM+ 2000, and Landsat8 to investigate the drivers responsible for the total VC pattern and changes which are linked to both natural and social processes. The analyses of the three satellite images concluded that the surface area of the total VC increased by 107.4% between 1987 and 2000, it was decreased by 27.5% between years 2000 and 2013. The field study, review of secondary data and community problem diagnosis using the participatory rural appraisal (PRA) method suggested that the drivers for this change are the deterioration and salinization of both soil and water resources. Ground truth data indicated that the deteriorated soils in the eastern part of the Al-Kharj AE are frequently subjected to sand dune encroachment; while the south-western part is frequently subjected to soil and groundwater salinization. The groundwater in the western part of the ecosystem is highly saline, with a salinity  $\geq 6$  dS m<sup>-1</sup>. The ecosystem management approach applied in this study can be used to alike AE worldwide.

**Keywords:** Change-detection, Remote sensing, Vegetation cover, PRA method, Al-Kharj agro-ecosystem

## 29 **List of abbreviations**

30 (EM) ecosystem management; (RS) remote sensing; (GIS) geographic information systems; (GPS) global  
31 positioning systems, (LC) land cover; (LU) land use; (VC) vegetation cover; (HA) holistic approach; (AE)  
32 agro-ecosystem; (PRA) participatory rural appraisal; (ECw) electrical conductivity measured on  
33 groundwater samples; (ECe) electrical conductivity measured on soil samples using saturated paste  
34 extracts.

## 35 **1. Introduction**

36 Many researchers working in ecosystem management (EM) find necessary to put communities as part of  
37 ecosystem rather than treating them as separate entity (Aly, 2007; Reed et al., 2009). The ecosystems give  
38 humankind many services such as provisioning services i.e., food, water, timber, fiber, and genetic  
39 resources, regulating services i.e., the regulation of climate, floods, disease, and water quality, cultural  
40 services i.e., recreational, aesthetic, and spiritual benefits, and supporting services i.e., soil formation,  
41 pollination, and nutrient cycling (Aly, 2007; Bochet, 2015). Soil and vegetation as a part of ecosystems  
42 give also many services to the humankind and play an important role in the earth system. The soil can act  
43 as a filter of heavy metals and parasitic microorganisms; consequently, prevent plant and groundwater from  
44 contamination (Keesstra et al., 2012; Brevik et al., 2015). Implementing sustainable EM implies improving  
45 the quality of community life without depleting the ecosystems for future generations. Brodt et al. (2011)  
46 and Maltby (2000) said that the newer concept of sustainability includes three dimensions, defined by three  
47 broad goals: economic opportunity, social equity, and environmental health. When these goals are reached,  
48 the sustainability will be achieved. However, Richardson et al. (2010) concluded that severe degraded  
49 ecosystem may shift the EM goals from ecosystem restoration and sustainability to reconstructing entirely  
50 new ecosystem. Since late 1980s an integration between EM, RS, GIS, and GPS has received substantial  
51 consideration in the literature (Ehlers et al., 1989; Hinto, 1996; Trabaquini, et al., 2012). This integration  
52 helps tackled more research problems related to EM. Nevertheless, the approaches by which these  
53 techniques are integrated have become more complicated due to diversified the fields to which its

54 integration with them has been applied (Gao, 2002). Indeed the RS, GIS, and GPS are providing desired  
55 technologies for land and environmental management (Leh et al., 2015; Seelan et al., 2003; Zucca et al.,  
56 2015). Two terms are usually used in abundance by land management researchers, LC and LU. The LC is  
57 defined as a physical material covered earth surface; however, LU is the human activities or economic  
58 functions related to specific part of land (Singh, 2013). The LC comprises vegetation, asphalt, bare ground,  
59 rivers, lakes...etc. Whilst the VC include only planted land i.e., grass, trees...etc (Aly, 2007; Singh, 2013).  
60 Loss of VC and plant species diversity reduces resistance of soil erosion and soil fertility (Cerdà and Doerr,  
61 2005; Berendse et al., 2015; Yu and Jia, 2014). The VC improve the infiltration rate and decrease surface runoff  
62 and erosion (Cerdà, 1999). Furthermore, the VC have considerably affected the global warming process  
63 through emissions of CO<sub>2</sub>. However, C sequestration by afforestation in terrestrial ecosystems could  
64 contribute to the decrease of atmospheric CO<sub>2</sub> rates (Muñoz-Rojas et al., 2015). The analysis of the impact of  
65 LU changes on landscape processes can aid on the future policies of AE (Debolini et al., 2015). The RS  
66 technology is usually used in EM (Almeida et al., 2005; Croft et al., 2012; Gong et al., 2015; Mohawesh et al.,  
67 2015; Rawat, 2013; Xie, 2008). Vrieling (2006) concluded that four types of factors are discussed by RS:  
68 topography, soil properties, VC, and management practices. Aly (2007) used the RS technology in the HA  
69 of Siwa, located in Egypt, AE sustainable management. Furthermore, Setiawan and Yoshino (2012) compared  
70 series of images through time to derive the land changes in Tsukuba, Japan. Often remote sensing imagery is  
71 imported into GIS software to facilitate analysis (Fichera et al., 2012). Chowdary et al. (2001) used the  
72 Indian remote sensing satellite (IRS) data of 1988 and 1996 to monitor the land resources and evaluate the  
73 land cover changes through a comparison of images acquired for same area at different times. Yang and  
74 Yang (1999) analyzed different temporal images of 1996 TM 1992 TM, 1988 TM, 1982 MSS and 1979  
75 MSS in purpose of detecting the coastal line change of Yellow River Delta. Suliman (2001) acquired three  
76 different dated satellite Thematic Mapper images (TM) for 1984, 1993, and 1999 in addition to topographic  
77 maps to obtain new vulnerability map that can detect erosion, reclamation, and development of Rosetta and  
78 Mutubas districts (markazes). El-Bana (2003) used two different dated satellite TM images to obtain

79 quantified changes in LU in northwestern part of Kafr El-Sheikh Governorate, Egypt. Furthermore, Aly  
80 (2007) used three satellite images 1973 (MSS), 2000 (ETM), and 2005 (ASTER) to detect changes of LC in  
81 Siwa oasis, Egypt. Desprats et al. (2014) used satellite remote sensing to identify VC in western part of Kingdom  
82 of Saudi Arabia (KSA). The use of RS and field studies in the KSA summarized that sand dunes and soil  
83 and groundwater deterioration are considered the main problems threaten the AEs (Algahtani et al., 2015; Aly  
84 et al., 2015; Alyemini, 2000). The sand dunes cover more than quarter of KSA surface (Alyemini, 2000).  
85 These include four major sandy deserts (Nafud, Dahna, Rub Al-Khali and Juffarah) in addition to other  
86 locally scattered sandy areas (Alyemini, 2000). The AEs is rarely found in vast dry land of KSA;  
87 furthermore, these AEs were usually considered fragile (Al-Omran et al., 2014). Al-Kharj is a productive AE  
88 set in a desert depression in central of KSA and is irrigated by waters originating from natural springs and  
89 dug wells with the lush of date palms, other fruits (e.g. grapes), and vegetables (e.g. lettuce, carrots,  
90 tomatoes, cucumbers, and melons). It is a dryland fragile AE that has a low degree of resilience to external  
91 stresses, and has a low carrying capacity (Al-Omran et al., 2014). Some primary studies recorded that the  
92 soils and groundwater in Al-Kharj were deteriorating in alarming way to lower suitability classes or  
93 sometimes to become unsuitable for cultivation (Al-Harbi, 2005). Consequently, the main objectives of this  
94 study are: i) to define the Al-Kharj, Saudi Arabia, AE problems and sustainability using community  
95 diagnosis and field study ii) to detect the Al-Kharj's VC changes using RS. iii) Develop interventions that  
96 help restore the ecosystem's functions and integrity and thus enhance the community's livelihood and  
97 promote social equity.

## 98 **2. Materials and methods**

### 99 **2.1 Study area**

100 The Al-Kharj is a fragile dryland AE has low resilience and carrying capacity. The ecosystem is located in  
101 arid conditions in the middle of the Kingdom of Saudi Arabia (KSA) east of Riyadh city. It is set at  
102  $24^{\circ}8'54''$  N,  $47^{\circ}18'18''$  E (Fig. 1). The groundwaters are considered the main source of irrigation, and the  
103 AE plants various fruits and vegetables (e.g., date palms and grapes, tomatoes, cucumbers, melons...etc.)

104 (Al-Omran et al., 2013). The Al-Kharj is located at 1360 m above sea level and its area is about 20.000 km  
105 <sup>2</sup> and has a population of more than 600,000 people. There are only two large towns in the studied AE  
106 (Dilam and Asseeh with population of 8492 and 49856 people, respectively); however, there are three  
107 small towns (Al-Hayathim, Yamamah, and Sulamiyya). Furthermore, The AE include many small hamlets  
108 and villages (Hagras et al., 2013). The Wadi (valleys) of Al-Kharj is discharged by water from Wadi  
109 Hanifa and some other small wadis compensating part of consumed groundwater. The Al-Kharj include  
110 numerous springs since ancient times; consequently, considered richest ecosystem in water resources in the  
111 KSA. The studied AE has supported the KSA with grain, dairy products and other produced crops and  
112 livestock products. Recently, the springs of Al-Kharj have dried up dramatically, like those in other places  
113 of the kingdom recurring drought (McLaren, 2008).

## 114 **2.2 Ecosystem-Problem Identification (Community)**

115 The purpose of this part of the fieldwork is to identify the human activities and practices of the region,  
116 particularly those that enhance ecosystem degradation within socio-economic and cultural constructs  
117 (Swallow et al., 2009). The knowledge, attitude and practices (KAP) study was conducted using the  
118 participatory rural appraisal (PRA) method, which includes the review of earlier study, field observation,  
119 substantial indicators, town-hall meetings with community, sequence of one-on-one meetings, and build up  
120 questionnaires. The PRA approach was used in this study to undertake diagnosis of the community, and  
121 issues of land productivity and their importance as distinguished by the ecosystem community in order to  
122 interpret the changes found by RS (Mushove and Vogel, 2005; Shepherd, 2008). The PRA is a  
123 concentrated, regular, but semi-structured learning practice conducted in a studied community by a  
124 multidisciplinary teamwork with complete contribution of the ecosystem community and stakeholders  
125 (Chambers, 1994; Mikkelsen, 1994). PRA help the researcher and community for identifying specific  
126 ecosystem problems and suggest solutions. The town-hall meeting was held in Al-Kharj including around

127 **Figure 1. Study area location**

129 250 persons of all stakeholders and farmers. The questionnaire was field-tested, and modifications was  
 130 made based on the results. The most suitable format appears to be an easy-to-respond, non-time-consuming  
 131 'tick box' structure. To this end, a suitable 123 questionnaire was designed collectively by the research  
 132 team in consultation with the local community to gather field information (Aly, 2007; Reed et al., 2009).  
 133 Coding for different variables has been accomplished and information gathered through the administered  
 134 123 questionnaires has been statistically analyzed and the tasks accomplished is recorded in this study.

### 135 **2.3 Remote sensing images characterization**

136 RS by satellite images has been used since 1972 by first satellite, Landsat1 (Dogci and Kusek, 2008). Due  
 137 to vast studied area, the proposed methodology is based on the use of remote sensing data. The very low  
 138 cloud coverage on the Arabian Peninsula allows the acquisition of a global imaging cover the study area  
 139 several years. In this study, a multi-temporal set of RS data of the Al-Kharj AE has been used to investigate  
 140 vegetation cover changes (Fichera et al., 2012; Lucas, 2007; Yuan et al., 2005). The main parts can be  
 141 distinguished by satellite image is the irrigated crops (Fig. 2). Three Satellite images over a period of  
 142 twenty six years were acquired as follows:

- 143 1. Landsat4 TM: acquisition date is (27-11-1987), with seven spectral bands including thermal band.  
 144 The ground sampling interval (Pixel size): 30 m reflective, 120 m thermal and scene size: 170 Km<sup>2</sup>  
 145 X 185 Km<sup>2</sup> (Fig. 2a).
- 146 2. Landsat7 ETM+ : acquisition date is (16-12- 2000), with eight spectral bands , one of these bands is  
 147 15 m resolution in Panchromatic, 60 m thermal, and 30 m other reflective bands (Fig. 2b).
- 148 3. Landsat8 : acquisition date is (28 -12-2013), with eleven spectral bands :  
 149 - Multispectral bands 1-7,9 : 30 meters

**Figure 2.** Satellite images of Al-Kharj ecosystem

- 152 - Panchromatic band 8 : 15 meter
- 153 - TIRS bands 10-11: resampled to 30 meter (Fig. 2c).

154 In order to mitigate the seasonal effects, which often lead to errors in change detection, the study adopted  
155 using only imagery acquired during the winter season, avoiding the uncertainty of inter-annual variability  
156 (Fichera et al., 2012).

## 157 **2.4 Delineation of Vegetation cover changes**

158 In satellite images processing techniques, bands ratio usually represents special surface characteristics. The  
159 difference of two bands are called "index ". If this index comes from near Infrared to Red regions of  
160 spectral, it represents "Vegetation **index (VI)** ". The green plants have chlorophyll and reflect Infrared  
161 bands in high level; consequently, it appears in red color in the satellite images (GeoMart, 2011).

162 For the normalization of the vegetation index data, the vegetation index has been divided by the total of the  
163 two bands. The result is then called "Normalized Difference Vegetation Index (NDVI) "and can be  
164 calculated as follow:

$$165 \quad \text{NDVI} = (\text{Nir} - \text{Red}) / (\text{Nir} + \text{Red})$$

166 The NDVI takes 32 bit data varying between (-1) and (1). The positive values represents the vegetation;  
167 however, the negative values represents the non-vegetated areas. These data can be scaled into 8 varying bit  
168 values (0 to 255). Where (-1) value goes to (0); on the other hand, (+1) value goes to (255). As a result of  
169 NDVI value, the light areas represent regions of high vegetation; however, the dark areas represent regions  
170 of low vegetation (Figure 3 a and b). The NDVI images could be classified into three classes, namely dense  
171 vegetation cover (NDVI > 0.5), moderate vegetation cover (NDVI 0.25 – 0.5), and sparse vegetation cover  
172 (NDVI < 0.25), as shown in Fig (4).

173 **Figure 3.** NDVI classification for Landsat satellite image

174 **Figure 4.** Vector layer for classified NDVI

## 175 2.5 Field Study

### 176 Water and Soil sampling and analysis

177 A 180 groundwater samples were gathered from different locations in the Al-Kharj AE to cover the spatial  
178 variations of the ecosystem groundwater salinity (Fig. 5). All samples were analyzed for salinity using  
179 electrical conductivity (EC) meter ( $\text{dS}\cdot\text{m}^{-1}$ ) (Test kit Model 1500\_20 Cole and Parmer) at 25 °C. The  
180 groundwater soluble calcium, magnesium, sodium, potassium, chloride, and sulfate were determined using  
181 Ion Chromatography System (ICS 5000, Thermo (USA)); however, the bicarbonate and carbonate  
182 concentration were determined by titration with sulfuric acid ( $\text{H}_2\text{SO}_4$ ) (Matiti, 2004). Furthermore, fifty soil  
183 samples were collected from studied area including deteriorated sites observed by satellite image for year  
184 2013 (ground truth). A soil paste extract were prepared, and the  $\text{EC}_e$  was measured for each sample (Klute,  
185 1986). In addition, A 5TE (Decagon devices) soil moisture, EC, and temperature sensors were installed at  
186 three date palm field in the Al Kharj AE. The three Investigated fields have different changes of VC  
187 between years 2000 and 2013. The first field (a) is located in eastern part of the study area with no change  
188 of VC and used fresh water for irrigation ( $\text{EC}_w = 1.1 \text{ dS m}^{-1}$ ). The second (b) is a deteriorated field located  
189 in middle to the western part and used saline brackish water for irrigation ( $\text{EC}_w = 6.5 \text{ dS m}^{-1}$ ). The third (c)  
190 is abandoned field located in southern part of the study area with notable decrease of VC, this field has no  
191 irrigation activities due to the high salinity of groundwater ( $\text{EC}_w=10.2 \text{ dS m}^{-1}$ ) (Fig 5). The first two  
192 irrigated fields adopted drip irrigation system.

### 193 Coordinate & GIS Analysis

194 In this study, the coordinates of the soils and groundwater samples were recorded by GPS with an accuracy  
195 of ~5 m. The GPS signal is corrected by a radio signal in real time. The locations of the ecosystem  
196 groundwater salinity ( $\text{EC}_w$ ) were configured as a comma-delimited text file (in the form of groundwater  
197 no, easting, and northing). The point data was overlaid on a satellite image by Arc GIS 9.3 software (ESRI,  
198 2010) (Fig. 5). kriging interpolation, geostatistical method, of  $\text{EC}_w$  was carried out using kriging

199 **Figure 5.** Location of the studied wells



200 interpolation tool of Geostatistical analyst in ArcGIS 9.3.

## 201 **Statistical analysis**

202 Statistical analysis was carried out using the statistical package for social sciences (IBM SPSS Statistics 21  
203 Core System, IBM Corporation 2012). The statistical tests applied were basic statistics (maximum,  
204 minimum, mean, standard deviation, variance, standard error, median, skewness) and Spearman's  
205 correlation matrix (assuming  $p < 0.01$ ).

## 206 **3. Results and discussion**

### 207 **3.1 Community Diagnosis of Ecosystem Problems**

208 Al-Kharj is a fragile ecosystem, highly vulnerable to environmentally induced land and water resources  
209 degradation. The ecosystem resource degradation problems in Al-Kharj are exacerbated by poor natural  
210 resource management and practices (Al-Omran et al., 2014).

211 The community diagnosis is considered a powerful investigation tool to overcome problems. The local  
212 people usually have an actual desire to solve their ecosystem problems. The PRA techniques were used to  
213 aid describe the issues that related to the characteristics of ecosystem to issues of agricultural and  
214 environment.

215 As an important tool of the PRA methodology, a **general village- hall meeting** was organized and held in  
216 the ecosystem. The farmers are most of ecosystem residents but some of the inhabitants have other  
217 employments e.g. merchants, civil servants and labors. The meeting was carried out by a large number of  
218 the ecosystem community and stakeholders' e.g. local government administrators, and engineer and staff of  
219 agricultural extension. The meeting was managed to recognize how the community understand and  
220 prioritize their land and environmental deteriorations and issues facing them (Aly, 2007, Chambers, 1994).

221

222

223 Agricultural problems summarized by community study

224 The PRA study found that the main agricultural problem in the studied ecosystem is the poor irrigation  
225 water quality which is causing soil salinization problems. This problem is aggravated by several factors  
226 such as:

- 227 • The numbers of new wells that were recently drilled for irrigation has increased dramatically causing  
228 depletion and deterioration of groundwater quality (Al-Omran et al., 2015; Aly et al., 2016).
- 229 • Poor irrigation practices in the Al-Kharj (excessive irrigation system). The same finding was recorded  
230 in Siwa AE, located in arid environment, by Aly et al. (2016)
- 231 • No agricultural drainage system in the Al-Kharj. Thus in some areas, the Al-Kharj could face the  
232 danger of water logging and salinization problems (Aly et al., 2016).
- 233 • Large investments in intensive cultivation which cultivates hundreds of acres, and drilled tens of new  
234 wells are causing great damage to the fragile ecosystem of the Al-Kharj (Algahtani et al., 2015; Aly,  
235 2007; Sonneveld et al., 2016).
- 236 • In summer there is no agriculture activity due to high temperature (reached 50°C) with exception  
237 protected area (Tourenq et al., 2009).
- 238 • Some farmer used desalination plant to overcome the irrigation water salinity (Al-Omran et al., 2014).
- 239 • Loss of biodiversity due to soil salinity. This is expected since salinization is the most common land  
240 degradation processes in arid and semi-arid regions (Farifteh et al., 2006)
- 241 • Farmers in Al-Kharj usually change their soils when deteriorated (Richardson et al., 2010).
- 242 • The rare and high cost of agricultural labor.

243 All the above mentioned agricultural issues and problems lead to a significant decrease in land productivity  
244 of the studied agro-ecosystem.

245

246

247 **3.2 Remote Sensing: Direction changes of vegetation cover**

248 The major changes detected in the study area between years 1987 and 2000 were the increasing of total VC  
249 in west and south-western part of Al-Kharj ecosystem (Table 1, Fig. 6). However, the total VC decreased  
250 between years 2000 and 2013 in the east and south-western part of Al-Kharj AE (Table 1, Fig. 6). The  
251 investigation of the three satellite images concluded that the surface area in square kilometers of the total  
252 VC increased dramatically between years 1987 and 2000 by 107.4%; however, it decreased by 27.5%  
253 between years 2000 and 2013 (Table 1) (Fichera et al., 2012). In an attempting to explicate the reason of the  
254 ecosystem total VC decrease in last decade, a relation between total VC and wheat production has been  
255 depicted. Figure (7) shows a direct relationship between wheat production in Saudi Arabia (USDA, 2015)  
256 and total VC in Al-Kharj AE. Furthermore, it recorded an evidence of progressive increase of wheat  
257 production and total VC during the period of 1984-1993 (Algahtani et al., 2015; Modaihsh et al., 2015;  
258 USDA, 2015). This was caused by the economic development that corresponds to the period of massive  
259 injection of subsidies that came with government's policy to expand the wheat production over this period  
260 (USDA, 2015). Rationally, this has led to a steady increase in the land area used up by vegetation.  
261 However, there were a nosedived during the period of 1994- 1998 due to the Saudi government stopped  
262 subsidies of wheat production to save water. A slight increase of total VC recorded between years 1998-  
263 2002, and a contentious decrease between years 2002- 2013. This study suggest that the decrease in the last  
264 decade of total VC was caused by land and water resources degradation (Sonneveld et al., 2016). This  
265 suggestion have been emphasized by field studies through PRA method and found in agreement with the  
266 findings of Algahtani et al. (2015).

267 **Table 1.** Spatio-temporal characteristics of Al-Kharj ecosystem

268 **Figure 6.** Change detection of vegetation cover

269 **Figure 7.** The changes of vegetation cover and wheat production

270

271

### 272 **3.3 Soil and water resources characteristics and its effects in agro-ecosystem**

273 The field study and observation, the review of secondary data, and community problem diagnosis using the  
274 PRA suggest that the driving role in the change of total VC recorded by RS in recent years are the soil and  
275 water resources deterioration and salinization. The ground truth found that the deteriorated soils are either  
276 subjected to salinization or sand dune encroachment (Figs 8, 9 and 10) (Al Omran et al., 2015; Alyemeni,  
277 2000). In general, the sand dune in eastern part of studied AE is considered the main problem facing  
278 agriculture expansion; however, the groundwater salinity is considered the main problem of southwestern  
279 part (Figs 8, 9 and 10) (Al Omran et al., 2015).

280 Table (2) shows that in the eastern part of the ecosystem 83% of groundwater samples were suitable for  
281 irrigation with some restriction ( $EC_w \leq 3 \text{ dS m}^{-1}$ ) (Ayers and Westcot, 1985); however, the remaining their  
282  $EC_w$  ranged between 3-4  $\text{dS m}^{-1}$  (Table 2). In response to irrigation water salinity, 76% of irrigated soil  
283  $E_{c_e} \leq 4 \text{ dS m}^{-1}$ , 18%  $E_{c_e}$  ranged between 4-10  $\text{dS m}^{-1}$ , and 5% soil  $E_{c_e} > 10 \text{ dS m}^{-1}$ . Nonetheless, the VC  
284 area decreased by 18% between years 2000-2013. In the middle and western part, the ecosystem showed  
285 more vulnerable soil conditions for soil degradation. Only 64% of the groundwater can be considered  
286 suitable for irrigation ( $EC_w \leq 3 \text{ dS m}^{-1}$ ). However, 20% of groundwater samples  $EC_w$  ranged between 3-4  
287  $\text{dS m}^{-1}$ , and 16% the  $EC_w$  ranged between 4-10  $\text{dS m}^{-1}$ . As a result, only 19% of the studied soil samples  
288  $E_{c_e} \leq 4 \text{ dS m}^{-1}$ , 50%  $E_{c_e}$  between 4-10  $\text{dS m}^{-1}$ , and regrettably 31% their  $E_{c_e} > 10 \text{ dS m}^{-1}$ . The VC is then  
289 decreased dramatically in this part by 33% between the years 2000-2013. The highest soil  $E_{c_e}$  in eastern  
290 part of studied ecosystem was 17.6  $\text{dS m}^{-1}$  (sample no 1); on the other hand, the middle part of the  
291 ecosystem deteriorated sites recorded 40.6 and 47.4  $\text{dS m}^{-1}$ , samples no 17 and 18, respectively (Table 3  
292 and Fig. 10). Moreover, the soil salinity dramatically increase in some sites of western ecosystem reaching  
293 41.7  $\text{dS m}^{-1}$  (site no 29) (Figs 6 and 10). The groundwater in western part of studied ecosystem is  
294 considered highly saline since its salinity almost more than 6  $\text{dS m}^{-1}$  (Fig. 9). Mostly, no soil sodicity  
295 hazards are anticipated by using this type of groundwater in irrigation. The SAR of studied water samples  
296 were less than 10 with an average of 3.74 (Table 4) (Richards, 1954). In general, 34.8% of the arable land

297 in the studied AE are considered saline ( $EC_e > 4 \text{ dS m}^{-1}$ ), 34.8% are severely saline ( $EC_e > 10 \text{ dS m}^{-1}$ ) and  
298 the remaining (30.4%) can be considered non saline ( $EC_e < 4 \text{ dS m}^{-1}$ ). The  $EC_e$  of Al-Kharj cultivated soils  
299 are ranged between 1 and  $47.4 \text{ dS m}^{-1}$  for un-deteriorated and deteriorated sites, respectively; however, the  
300 uncultivated soil's  $EC_e$  reached  $140 \text{ dS m}^{-1}$  in western AE.

### 301 **3.4 Total Vegetation cover degradation and land and water resources salinity**

302 In order to prove that the land and water resources salinity of past ten years are the main cause of total VC  
303 decrease in the ecosystem, the changes of total VC has been linked to water and soil salinity levels at three  
304 different fields (Fig. 11). The soil parameters (soil moisture, EC, and temperature) were recorded at  
305 investigated fields by sensors. The average values of soil parameters of four date palms at depth (0-30 cm)  
306 for each field were presented (Fig. 11). The sensors in abandoned field did not work properly due to the  
307 low soil water content ( $\sim 0.01 \text{ m}^3\text{m}^{-3}$ ) where the precipitation is negligible (Gao et al., 2014; Saha et al.,  
308 2015). The results indicated that the irrigation with low water salinity in the first field did not lead to high  
309 soil salinity values (average soil's  $EC = 1.25 \text{ dS m}^{-1}$ ) (Fig. 11). The leaching process led to the soil salinity  
310 to get lower with adding irrigation. However, the irrigation with saline water in the second field led to soil  
311 quality deterioration due to salinity (average soil's salinity was equal to  $6.7 \text{ dS m}^{-1}$ ) (Fig. 11). The soil in  
312 the abandoned field is suffering from severe salinity (averaged  $39.2 \text{ dS m}^{-1}$ ) due to lack of irrigation and the  
313 low precipitation. Subsequently, soluble salts have been accumulated in the top soil layer negatively  
314 impacting on total VC water uptake and growth due to low tolerance of the total VC to very high salinity.  
315 These are expected results as salinization and alkalinization are the most common land degradation

316 **Figure 8.** Sand dune encroachment

317 **Figure 9.** Interpolation of groundwater EC

318 **Figure 10.** Soil salinity in of studied ecosystem

319 **Table 2** Water and soil deteriorated parameter (salinity) and VC area

320 **Table 3** Statistical analysis of studied groundwater

321 **Table 4** Descriptive statistics of Al-Kharj groundwater

322 processes in arid and semi-arid regions (Farifteh et al., 2006). Since the temperature of Al Kharj reaching  
323 45 °C in July, the soil temperature was also investigated in this study. Figure (11) clearly demonstrate that  
324 the summer irrigation led to dramatic decrease of soil temperature (up to 5 °C). During the irrigation, the air  
325 is replaced with water leading to the decrease in soil temperature. On contrary, following the irrigation, the  
326 water drains and air would fill up the soil pores and the soil temperature gets higher (Fig. 11) (USAD,  
327 2002). Comparing the three site VC, it is clear that the high salinity of the land caused by high salinity of  
328 groundwater resources had negative impact on vegetation survival especially in absence of leaching of salts  
329 by rainfall or fresh irrigation water. In addition, the sand dune encroachment represents another cause of  
330 the VC decrease in the eastern part of the study sites (Fig. 8). The farmers of Al-Kharj should be informed  
331 about the water quality of their wells and should be given advice by the extension services about the type of  
332 suitable crops and management that would safe guard the Al-Kharj ecosystem. The government should take  
333 an action to solve the problem of sand dune encroachment in the eastern part of the ecosystem, and help  
334 farmers to select salinity tolerance crops that can survive such conditions. Sand dune fixation is generally  
335 used to stop the dunes encroachment. Two methods are usually used; biological i.e., planting trees, shrubs  
336 and grasses species, and mechanical i.e., wooden sand fences and footpaths. Shelterbelt systems and  
337 afforestation, biological methods, using *Atriplex spp.*, *Acacia spp.*, and *Casuarina spp.* were found efficient  
338 in stabilizing dunes in arid environment of Egypt, Senegal, and India (Draz et al., 1992; Kaul, 1985). In  
339 fact, the importance of the sand dunes fixation by afforestation is not only sand dune fixation but also can  
340 conserve arid ecosystem balance, and produce fuel and animals feed (Draz et al., 1992; Kaul, 1985).

341 In the USA, Tunisia, and Egypt saline waters have been successfully used for long irrigation time. The  
342 crops grown using this water are cotton, sugar beet, alfalfa, date palm, sorghum, barley, alfalfa, rye grass  
343 and artichokes (Rhoades et al., 1992). In Texas, USA, the saline groundwater (TDS = 2500 to 6000 mg/l)  
344 has been successfully used for three decades (Rhoades et al., 1992).

345 **Figure 11.** VC linked soil salinity

346 The suitability of saline groundwater for irrigation should be assessed for specific conditions including;  
347 crops type, soil characteristics, irrigation methods, cultural practices, and climatic conditions (Minhas,  
348 1996). Many rational management option of saline irrigation water have been currently in use, some of  
349 them are: cyclic strategy, which involves using non-saline water and saline water in a repeating sequence,  
350 blending strategy which involves blending (dilution process) fresh with saline water, rotation strategy  
351 which means irrigation with low-salinity water for salt sensitive crops in a rotation with saline water for  
352 salt-tolerant crops (Rhoades et al., 1992), planting salt tolerant crop varieties or genotypes / cultivars i.e.,  
353 amaranth and quinoa which can survive under harsh conditions (Fghire et al., 2015; Pulvento, et al., 2015),  
354 and finally the use of computer model for assessing water suitability for crops production (Aly et al., 2015).

#### 355 **4. Conclusions**

356 A comprehensive analyses of Al-Kharj, Saudi Arabia, agro-ecosystem components (physical resources and  
357 community) were conducted in this study. The field study and community-based diagnosis in addition to  
358 the use of satellite images to detect agriculture land-use changes over the twenty six years revealed that the  
359 groundwater and agricultural lands have been seriously degraded due to salinization. The major ecosystem  
360 changes detected by RS was total VC surface area increased between years 1987 and 2000 by 107.4%;  
361 however, it decreased by 27.5% between years 2000 and 2013. Between years 1984 and 1998, a direct  
362 relationship between wheat production in Saudi Arabia and total VC changes in studied AE is recorded.  
363 The Saudi government subsidies to wheat production is governed the total VC changes in this period.  
364 However, in the following years, the degradation of land and water resources induced the total VC changes.  
365 This study found that the sand dune encroachment in eastern part of the AE is the main problem facing  
366 agriculture expansion; however, the land and groundwater salinity is considered the main problem in the  
367 middle and southwestern ecosystem. In the eastern ecosystem, 83% of the studied groundwater samples  
368 were suitable for irrigation with some restrictions ( $EC_w \leq 3 \text{ dS m}^{-1}$ ) and 76% of irrigated soil's  $E_{ce} \leq 4 \text{ dS}$   
369  $\text{m}^{-1}$ . However, in the middle and western part, 64% of the groundwater can be considered suitable for  
370 irrigation ( $EC_w \leq 3 \text{ dS m}^{-1}$ ), and only 19% of the studied soil samples its  $E_{ce} \leq 4 \text{ dS m}^{-1}$ . The farmers of Al-

371 Kharj should be informed about the water quality of their wells and should be given advice by the  
372 extension services about the type of suitable crops and management that would safe guard the Al-Kharj  
373 ecosystem.

374  
375 **Acknowledgment**

376 *This project was supported by NSTIP strategic technologies program number (12-ENV2581-02) in the*  
377 *Kingdom of Saudi Arabia*

378 **References**

379 Algahtani, O. S., Salama, A. S., Iliyasa, A. M., Selim, B. A., Kheder, K.: Monitoring urban and land use  
380 changes in Al-Kharj Saudi Arabia using remote sensing techniques. Progress in systems  
381 engineering: Proceedings of the twenty-third international conference on systems engineering,  
382 Advances in Intelligent Systems and Computing 1089, Springer International Publishing  
383 Switzerland 2015. Pp. 515-523, DOI 10.1007/978-3-319-08422-0\_75, 2015.

384 Al-Harbi, M. A.: Effect of Cultivation Periods on Pedological Characteristics of some Soils in Harrad and  
385 Al-Kharj. M. Sc. Thesis, Soil Science Department, College of Agriculture, King Saud University,  
386 Saudi Arabia, 2005.

387 Almeida, C. M., Monteiro, A. M. V., Mara, G., Soares-Filho, B. S., Cerquera, G. C., Pennachin, C. S. L.,  
388 Batty, M.: GIS and remote sensing as tools for the simulation of urban land-use change.  
389 International Journal of Remote Sensing, 26, 759-774,  
390 <http://dx.doi.org/10.1080/01431160512331316865>, 2005.

391 Al-Omran, A. M., Aly, A. A., Al-Wabel, I. M., Sallam, A. S., Al-Shayaa, M. S.: Hydrochemical  
392 Characterization of Groundwater under Agricultural Land in Arid Environment: a Case Study of Al-  
393 Kharj, Saudi Arabia. Accepted. Arabian Journal of Geoscience, 2015.

394 Al-Omran, A. M., Aly, A., Sallam, A.: A Holistic Ecosystem Approach for the Sustainable Development of  
395 Fragile Agro-ecosystems: A case study of the Al-Kharj Ecosystem, Saudi Arabia. National Science,  
396 Technology and Innovation Plan, Kingdom of Saudi Arabia, for financial support of project 12-  
397 ENV2581-02, 2014.



- 398 Al-Omran, A. M., Louki, I. I., Aly, A. A., Nadeem, M. E.: Impact of Deficit Irrigation on Soil Salinity and  
 399 Cucumber Yield under greenhouse condition in arid environment. *Journal of Agricultural Science*  
 400 *and Technology* 15: 1247-1259, 2013.
- 401 Aly, A. A., Al-Omran, A. M., Alharby, M. M.: The water quality index and hydrochemical characterization  
 402 of groundwater resources in Hafar Albatin, Saudi Arabia. *Arab J Geosci.*, 8(6), 4177-4190, DOI  
 403 10.1007/s12517-014-1463-2, 2015.
- 404 Aly, A. A., Kishk, F. M., Gaber, H. M., Al-Omran, A. M.: Long-term detection and hydrochemistry of  
 405 groundwater resources in Egypt: Case study of Siwa Oasis. *Journal of the Saudi Society of*  
 406 *Agricultural Sciences*, 15(1), 67-74, doi:10.1016/j.jssas.2014.04.003, 2016.
- 407 Aly, A. A.: A Holistic Ecosystem Approach for Sustainable Management of Land and Water Resources in  
 408 Siwa Oasis. PhD Thesis, Faculty of Agriculture, Alexandria University, Egypt, 2007.
- 409 Aly, A., Al-Omran, A.M., Khasha, A.: Water management for cucumber: Greenhouse experiment in Saudi  
 410 Arabia and modeling study using SALTMED model. *Journal of soil and water conservation*, 70(1),  
 411 1-11, doi: 10.2489/jswc.70.1.1, 2015.
- 412 Alyemeni, M. N.: Ecological Studies on Sand dunes Vegetation in Al-Kharj region, Saudi Arabia. *Saudi*  
 413 *journal of biological science* 7: 64-87, 2000.
- 414 Ayers, A. S., Westcot, D. W.: *Water Quality for Agriculture*. Irrigation and Drainage Paper 29 (Rev.1).  
 415 FAO, Rome, Italy, 1985.
- 416 Berendse, F., van Ruijven, J., Jongejans, E., Keesstra, S. D.: Loss of plant species diversity reduces soil  
 417 erosion resistance of embankments that are crucial for the safety of human societies in low-lying  
 418 areas, *Ecosystems*, 18, 881-888, DOI: 10.1007/s10021-015-9869-6, 2015.
- 419 Bochet, E.: The fate of seeds in the soil: a review of the influence of overland flow on seed removal and its  
 420 consequences for the vegetation of arid and semiarid patchy ecosystems, *Soil*, 1, 131-146,  
 421 doi:10.5194/soil-1-131-2015, 2015.
- 422 Bocking, S.: Visions of nature and society: A history of the ecosystem concept, *Alternatives*, 20, 12-18,  
 423 1994.
- 424 Brevik, E. C., Cerdà, A., Mataix-Solera, J., Pereg, L., Quinton, J. N., Six, J., and Van Oost, K.: The  
 425 interdisciplinary nature of Soil. *Soil* 1: 117-129, doi:10.5194/soil-1-117-2015, 2015.
- 426 Brodt, S., Six, J., Feenstra, G., Ingels, C., Campbell, D.: Sustainable Agriculture. *Nature Education*  
 427 Knowledge 2(11):1. (Available on - line at:

- 428 <http://www.nature.com/scitable/knowledge/library/sustainable-agriculture-23562787> accessed on 11  
429 March 2015), 2011.
- 430 Cerdà, A., Doerr, S. H.: Influence of vegetation recovery on soil hydrology and erodibility following fire:  
431 An 11-year investigation. *International Journal of Wildland Fire* 14 (4): 423-437. DOI:  
432 10.1071/WF05044, 2005.
- 433 Cerdà, A.: Parent material and vegetation affect soil erosion in eastern Spain. *Soil Science Society of  
434 America Journal* 63 (2): 362-368. doi:10.2136/sssaj1999.03615995006300020014x, 1999.
- 435 Chambers, R.: Participatory Rural Appraisal (PRA): Analysis of Experience. *World Development* 22:  
436 1253-1268. 1994.
- 437 Chowdary, V. M., Paul, S., Kumar, T., Sudhakar, S., Adiga, S.: Remote sensing and GIS approach for  
438 watershed monitoring and Asian Conference on Remote Sensing, 5-9 November 2001. Singapore 2:  
439 802-807, 2001.
- 440 Croft, H., Kuhn, N. J., Anderson, K.: On the use of remote sensing techniques for monitoring spatio-  
441 temporal soil organic carbon dynamics in agricultural systems. *Catena* 94: 64–74, 2012.
- 442 Dagci, M., Kusek, G.: Monitoring microcatchment by using satellite imagery: Kiziloz sample, in: Coskun,  
443 H.G., Cigizoglu, H.K., Makktav, D. (Eds.), *Integration of information for environmental security*,  
444 Springer, pp. 175-189, 2008.
- 445 Debolini, M., Schoorl, J. M., Temme, A., Galli, M., Bonari, E.: Changes in Agricultural Land Use  
446 Affecting Future Soil Redistribution Patterns: A Case Study in Southern Tuscany (Italy), *Land  
447 Degradation and Development*, 26 (6), 574-586, DOI: 10. 1002/ldr. 2217, 2015.
- 448 Desprats, J. F., Al-Omran, A. M., Desmartis, B.: Harrats project - Evaluation of water requirement for  
449 irrigated agriculture with remote sensing. BRGM/RP- 63531 -FR, 45 p., 40 ill, 2014.
- 450 Draz MY, Ahmed AM, Afify MY. Studies on sand encroachment in Siwa Oasis, Western desert, Egypt. II-  
451 Feasibility of sand dune fixation measures. *J. Eng. and Appl. Sci.*, 39 (4):723 – 725, 1992.
- 452 Ehlers, M., Edwards, G., Bedard, Y.: Integration of remote sensing with geographic information system: A  
453 necessary evolution. *Photogrammetric Engineering and Remote Sensing*, 55(11), 1619-1627, 1989.
- 454 EL-Bana, T. A.: Agro-ecological assessment of land and water resources Norther Nile delta: A case study  
455 in kafr EL-Sheikh governorate: M.Sc. Thesis, Fac. Of Agric., Alex. Univ., Egypt. 2003.
- 456 ESRI.: Arc View version 10 user manual. Redlands, CA, USA, 2010.

- 457 Farifteh, J., Farshad, A., George, R. J.: Assessing salt-affected soils using remote sensing, solute modelling,  
458 and geophysics. *Geoderma* 130: 191–206, 2006.
- 459 Fghire, R., Wahb, S., Anaya, F., Ali, O., Benhabib, O., Ragab, R.: Response of quinoa to different water  
460 management strategies: field experiments and saltmed model application results. *Irrig. and Drain.*,  
461 64(1), 29-40, 10.1002/ird.1895, 2015.
- 462 Fichera, C. R., Modica, G., Pollino, M.: Land Cover classification and change-detection analysis using  
463 multi-temporal remote sensed imagery and landscape metrics. *European Journal of Remote Sensing*,  
464 45, 1-18, doi: 10.5721/EuJRS20124501, 2012.
- 465 Forget, G., Lebel, J.: An ecosystem approach to human health. *International Journal of Occupational and*  
466 *Environmental Health*, 7, S1-S37, 2001.
- 467 Gao, J.: Integration of GPS with Remote Sensing and GIS: Reality and Prospect. *Photogrammetric*  
468 *Engineering and Remote Sensing*, 68 (5), 447-453, 2002.
- 469 Gao, X., Wu, P., Zhao, X., Wang, J., Shi, Y.: Effects of land use on soil moisture variations in a semi-arid  
470 catchment: Implications for land and agricultural water management, *Land Degradation and*  
471 *Development*, 25 (2), 163-172, DOI: 10.1002/ldr.1156, 2014.
- 472 GeoMart.: Understanding Color Infrared (CIR) Aerial Photography. Retrieved 28 June 2011 from:  
473 <http://www.geomart.com/products/aerial/cir.htm>, 2011.
- 474 Gong, Z., Kawamura, K., Ishikawa, N., Goto, M., Wulan, T., Alateng, D., Yin, T., and Ito, Y.: MODIS  
475 normalized difference vegetation index (NDVI) and vegetation phenology dynamics in the Inner  
476 Mongolia grassland, *Solid Earth*, 6, 1185-1194, doi:10.5194/se-6-1185-2015, 2015.
- 477 Grumbine, R. E.: What is ecosystem management? *Conservation Biology*, 8, 27-38. DOI: 10.1046/j.1523-  
478 1739.1994.08010027, 1994.
- 479 Hagra, M. A., Elmoustafa, A. M., Ahmed, K.: Flood plain mitigation in arid regions case study: South of  
480 Al-Kharj city, Saudi Arabia, *IJRRAS* 16 (1), 147-156, 2013.
- 481 Hinto, J. C.: GIS and remote sensing integration for environmental applications. *International Journal of*  
482 *Geographic Information Systems*, 10 (7), 877-890, 1996.
- 483 Jenny, H.: *The soil resource origin and behavior*. Springer Verlag. New York, 1962.
- 484 Kaul RN. A forestation of dune area. In: *Sand dune stabilization, shelterbelts and afforestation in the dry*  
485 *zones*. FAO Conservation Guide, 10:75- 85, 1985.

486 Keesstra, S. D., Geissen, V., van Schaik, L., Mosse, K., Piirinen, S.: Soil as a filter for groundwater  
487 quality. *Current Opinions in Environmental Sustainability*, 4, 507-  
488 516.doi:10.1016/j.cosust.2012.10.007. 2012.

489 Klute, A.: *Methods of soil analysis. Part 1. 2nd (ed.) Agron Monor. 9.* ASA and SSSA, Madison, WI. 1986.

490 Leh, M., Bajwa, S., Chaubey, I.: Impact of land use change on erosion risk: and integrated remote sensing  
491 geographic information system and modeling methodology. *Land Degradation & Development*, 24,  
492 409- 421, DOI 10.1002/ldr.1137, 2013.

493 Maltby, E.: *Ecosystem approach: From principle to practice Ecosystem Service and Sustainable Watershed*  
494 *Management in North China. International Conference, Beijing, P.R. China, pp. 205 – 224, 2000.*

495 Matiti, S. K.: *Handbook of methods in environmental studies: water and wastewater analysis* ABD  
496 *Publishers. Jaipur (India), 2004.*

497 McLaren, S. J., Al-Juaidi, F., Bateman, M. D., Millington, A. C.: First evidence for episodic flooding  
498 events in the arid interior of central Saudi Arabia over the last 60 ka. *Journal of Quaternary Science*,  
499 24, 198–207, 2008.

500 Mikkelson, B.: *Methods for development work and research: A guide for practitioners.* New Delhi/  
501 *Thousand oaks/ London: Saga Publications, 1994.*

502 Minhas, P.S.: Saline water management for irrigation in India, *Agricultural Water Management*, 30, (1), 1–  
503 24, 1996.

504 Modaihsh, A. S., Mahjoub, M. O., Sallam, A. S., Ghoneim, A. M.: Evaluation of soil degradation in Al-  
505 Kharj center, Saudi Arabia using remote sensing. *International Journal of Remote Sensing &*  
506 *Geoscience (IJRSG)*, 4 (5): 1-7, 2015.

507 Mohawesh, Y., Taimeh, A., and Ziadat, F.: Effects of land use changes and soil conservation intervention  
508 on soil properties as indicators for land degradation under a Mediterranean climate, *Solid Earth*, 6,  
509 857-868, doi:10.5194/se-6-857-2015, 2015.

510 Muñoz-Rojas, M., Jordán, A., Zavala, L. M., De la Rosa, D., Abd-Elmabod, S. K., Anaya-Romero, M.:  
511 *Impact of Land Use and Land Cover Changes on Organic Carbon Stocks in Mediterranean Soils*  
512 *(1956-2007)*, *Land Degradation and Development*, 26 (2), 168-179, DOI: 10. 1002/ldr. 2194, 2015.

513 Mushove, P., Vogel, C.: Heads or tails? Stakeholder analysis as a tool for conservation area management,  
514 *Global Environmental Change*, 15, 184-198, 2005.

- 515 Peden, D.: Ecosystem Approaches to Human Health: Is There a Doctor on the Farm?" Program Initiative,  
516 IDRC, Canada, 2000.
- 517 Pulvento, C., Lavini, A., Riccardi, M., Andria, R.D., Ragab, R.: Assessing Amaranth Adaptability in a  
518 Mediterranean Area of South Italy under Different Climatic Scenarios. *Irrig. and Drain.*, 64 (1), 50-  
519 58, DOI: 10.1002/ird.1906, 2015.
- 520 Rawat, J. S., Biswas, V., Kumar, M.: Changes in land use/cover using geospatial techniques: A case study  
521 of Ramnagar town area, district Nainital, Uttarakhand, India. *The Egyptian Journal of Remote*  
522 *Sensing and Space Sciences*, 16, 111–117, 2013.
- 523 Reed, M. S., Graves, A., Dandy, N., Posthumus, H., Hubacek, K., Morris, J., Prell, C., Quinn, C. H.,  
524 Stinger, L. C.: Who's in and why? A typology of stakeholder analysis methods for natural resource  
525 management, *Journal of Environmental Management*, 90, 1933-1949, 2009.
- 526 Rhoades, D., Kandiah, A., Mashali, A.M.: The use of saline waters for crop production - FAO irrigation  
527 and drainage paper 48, 1992.
- 528 Richards, L. A.: (Ed.) *Diagnosis and improvement of saline and alkali soils*. USDA Hand book, No. 60,  
529 160, 1954.
- 530 Richardson, P. J., Lundholm J. T., Larson D. W.: Natural analogues of degraded ecosystems enhance  
531 conservation and reconstruction in extreme environments, *Ecological Applications*, 20, 728–  
532 740. <http://dx.doi.org/10.1890/08-1092.1>, 2010.
- 533 Saha, D., Kukal, S. S.: Soil structural stability and water retention characteristics under different land uses  
534 of degraded lower himalayyas of North-West India, *Land Degradation and Development*, 26 (3),  
535 263-271. DOI: 10. 1002/ldr. 2204, 2015.
- 536 Seelan, K. S., Laguette, S., Casady, G. M., Seielstad, G. A.: Remote sensing applications for precision  
537 agriculture: A learning community approach, *Remote Sensing of Environment*, 88, 157–169, 2003.
- 538 Setiawan, Y., Yoshino, K.: Change detection inland-use and land-cover dynamics at a regional scale from  
539 modis time-series imagery. *ISPRS Annals of the Photogrammetry, Remote Sensing and Spatial*  
540 *Information Sciences*, Volume I-7, 2012 XXII ISPRS Congress, 25 August – 01 September 2012,  
541 Melbourne, Australia, 2012.
- 542 Shepherd, G. (ed.): *The Ecosystem Approach: Learning from Experience*. International Union for  
543 Conservation of Nature and Natural Resources, Gland, Switzerland, 2008.

544 Singh, B. G.: Detection of land use and land cover change with Remote Sensing and GIS: A case study of  
545 Punjab Siwaliks, *International Journal of Geomatics and Geosciences*, 4 (2), 296-304, 2013.

546 Sonneveld, B. G., Keyzer, M. A., and Ndiaye, D.: Quantifying the impact of land degradation on crop  
547 production: the case of Senegal, *Solid Earth*, 7, 93-103, doi:10.5194/se-7-93-2016, 2016.

548 Suliman, A. S.: Change detection from satellite images in Nile Delta Coastal, Egypt, *Alexandria Journal of*  
549 *Agriculture Research*, 46, 177-188, 2001.

550 Swallow, B. M., Kallesoe, M. F., Iftikhar, U. A., Van Noordwijk, M., Bracer, C., Scherr, S. J., Raju, K. V.,  
551 Poats, S. V., Kumar Duraiappah, A., Ochieng, B. O., Mallee, H., Rumley, R.: Compensation and  
552 rewards for environmental services in the developing world: framing pan-tropical analysis and  
553 comparison, *Ecology and Society*, 14 (2), 26. [online] URL:  
554 <http://www.ecologyandsociety.org/vol14/iss2/art26/>, 2009.

555 Tourenq, C., Khassim, A., Sawaf, M., Shuriqi, M. K., Smart, E., Ziokowski, M., Brook, M., Wan, R. S.,  
556 Perry, L.: Characterisation of the Wadi Wurayah Catchment Basin, the First Mountain Protected  
557 Area in the United Arab Emirates. *International Journal of Ecology and Environmental Sciences*, 35  
558 (4), 289-311, 2009.

559 Trabaquini, K., Formaggio, A.R., Galvão, L.S.: Changes in physical properties of soils with land use time  
560 in the Brazilian savanna environment, *Land Degradation and Development*, 26 (4), 397-408, DOI:  
561 10.1002/ldr.2222, 2015.

562 United States Department of Agriculture (USDA): Saudi Arabia Wheat Production by Year. Available  
563 online at:  
564 <http://www.indexmundi.com/agriculture/?country=sa&commodity=wheat&graph=production>.  
565 Accessed on October, 2015. 2015.

566 USDA.: The temperature regime for selected soils in the United States. Soil survey investigations, report  
567 no. 48. National soil survey center, Lincoln, Nebraska, 2002.

568 Vrieling, A.: Satellite remote sensing for water erosion assessment: A review, *Catena*, 65, 2 – 18, 2006.

569 WECD.: Report of the World Commission on Environment and Development, United Nations. General  
570 Assembly Resolution 42/187, Retrieved: 2007, 1987.

571 Woodley, S., Alward, G., Gutierrez, L. I., Hoekstra, T., Holt, B., Livingston, L., Loo, J., Skibicki, A.,  
572 Williams, C., Wright, P.: North American Test of Criteria and Indicators of Sustainable Forestry.  
573 United States Department of Agriculture (USDA), Forest Service Inventory and Monitoring  
574 Institute, Report No. 3, 1999.

- 575 Xie, Y., Sha, Z., Yu, M.: Remote sensing imagery in vegetation mapping: a review, *Journal of Plant*  
576 *Ecology*, 1(1), 9-23, 2008.
- 577 Yidana, S. M., Yidana, A.: Assessing water quality index and multivariate analysis, *Environ. Earth Sci.*,  
578 (59), 1461-1473, 2010.
- 579 Yu, Y., Jia, Z. Q.: Changes in soil organic carbon and nitrogen capacities of *Salix cheilophila* Schneid  
580 along a revegetation chronosequence in semi-arid degraded sandy land of the Gonghe Basin, Tibet  
581 Plateau, *Solid Earth*, 5 (2), 1045-1054, DOI: 10.5194/se-5-1045-2014, 2014.
- 582 Zucca, C., Wu, W., Dessena, L., Mulas, M.: Assessing the effectiveness of land restoration intervention in  
583 dry lands by multitemporal remote sensing – A case study in Ouled Dlim (Marrakesh, Morocco),  
584 *Land Degradation & Development*, DOI: 10.1002/ldr.2307, 2015.
- 585

586

587

588

589

590

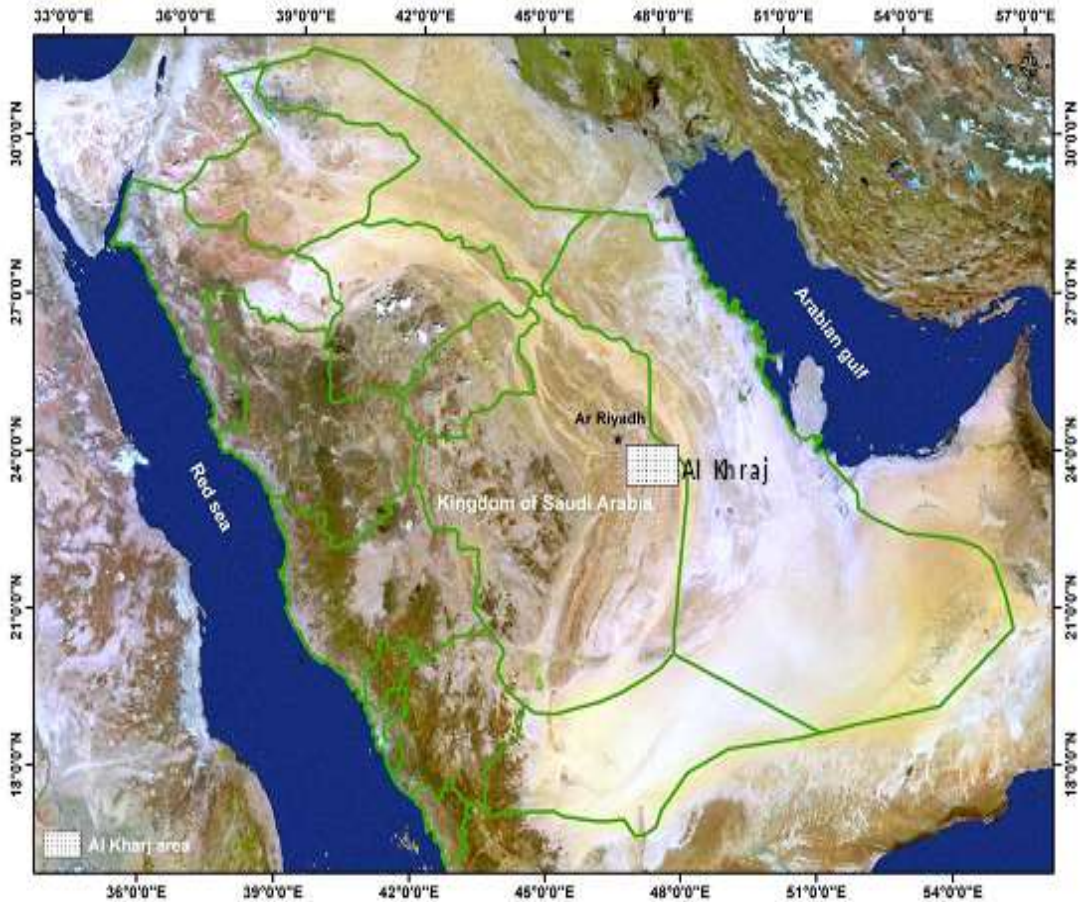

591

592

593

**Figure 1.** Location of the study area



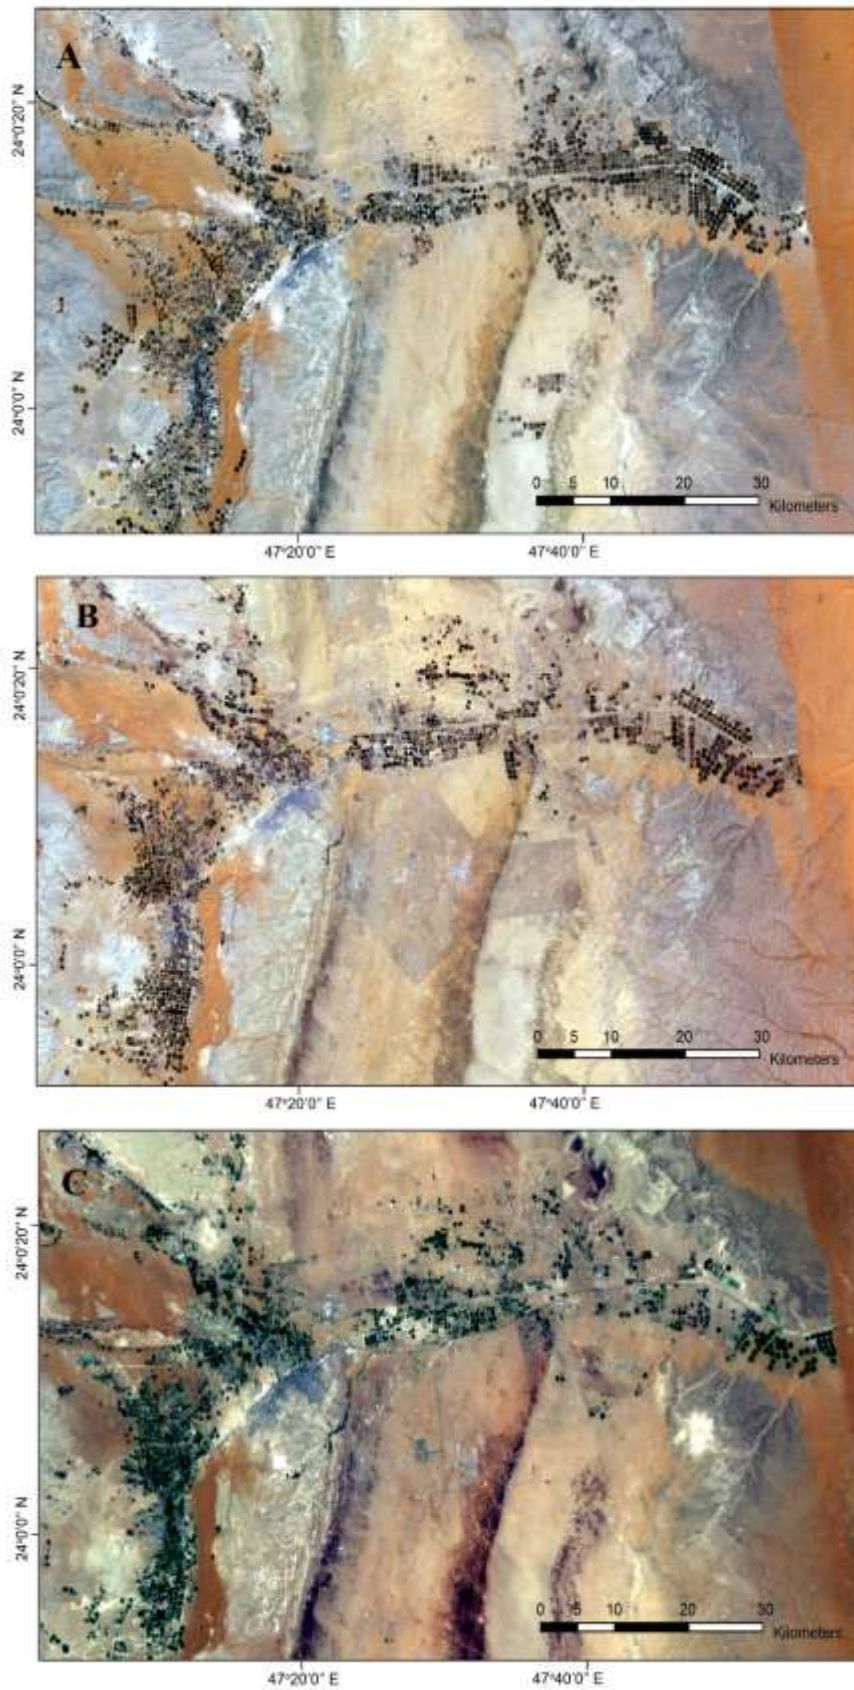

594

595 **Figure 2.** Satellite images of Al-Kharj ecosystem A) Landsat4 TM B) Landsat7 ETM+  
 596 C) Landsat8

597

598

599  
600

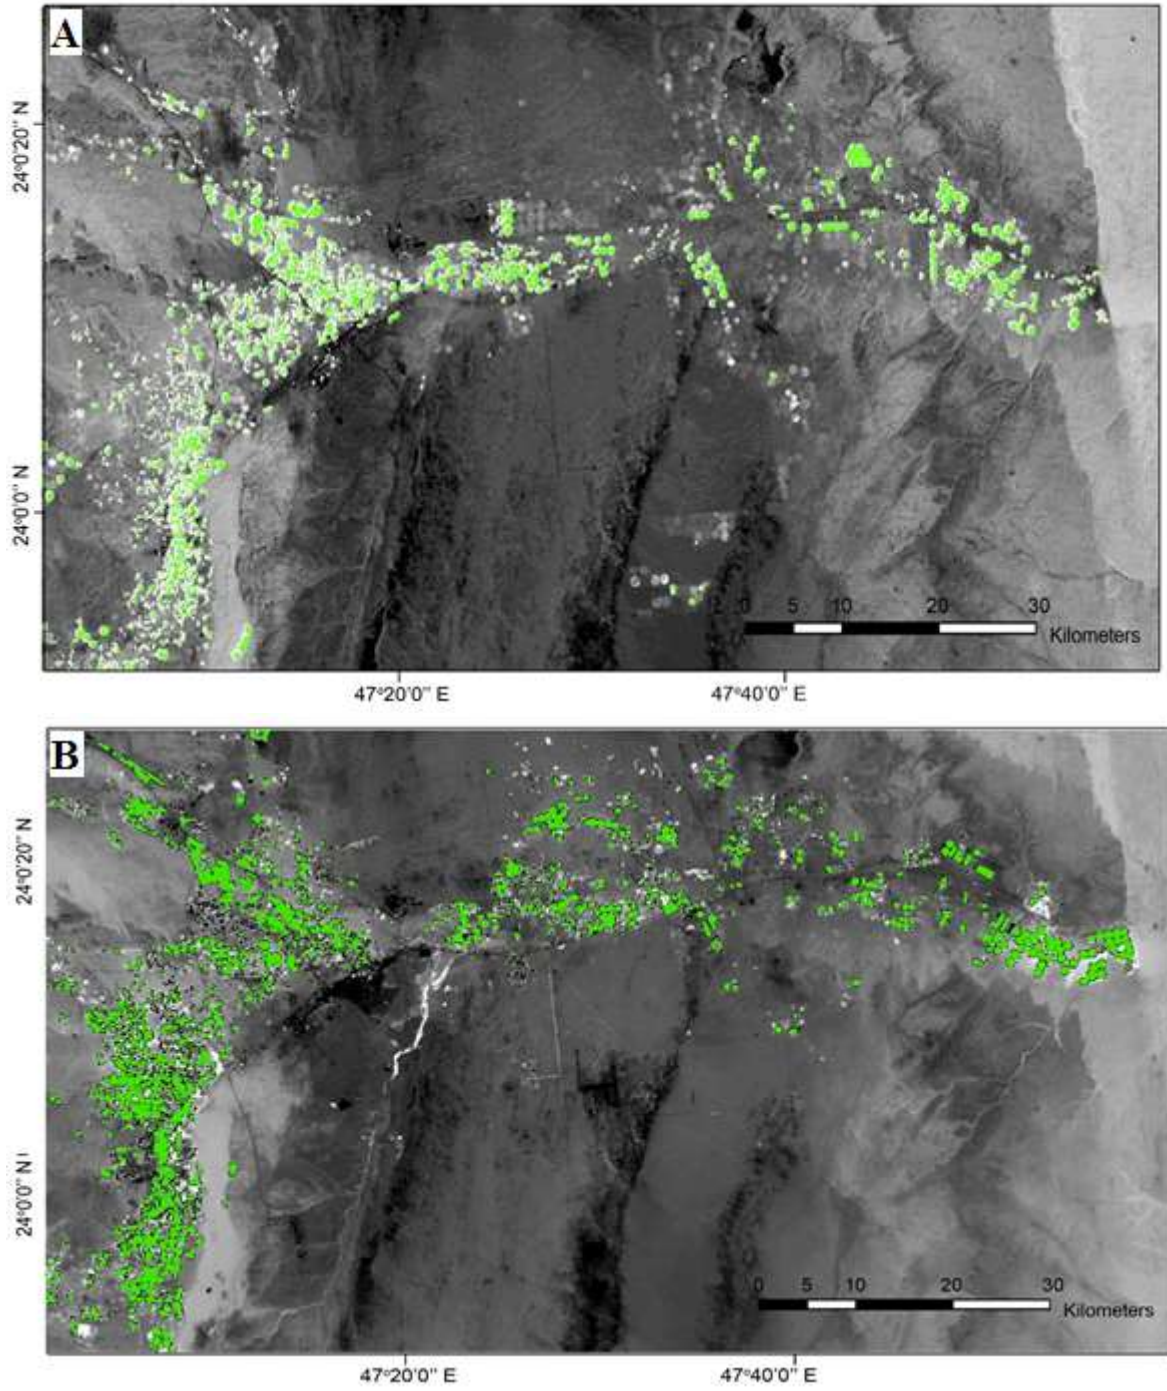

601  
602

**Figure 3.** NDVI classification for Landsat satellite image of Al-Kharj A) 1987 B) 2013



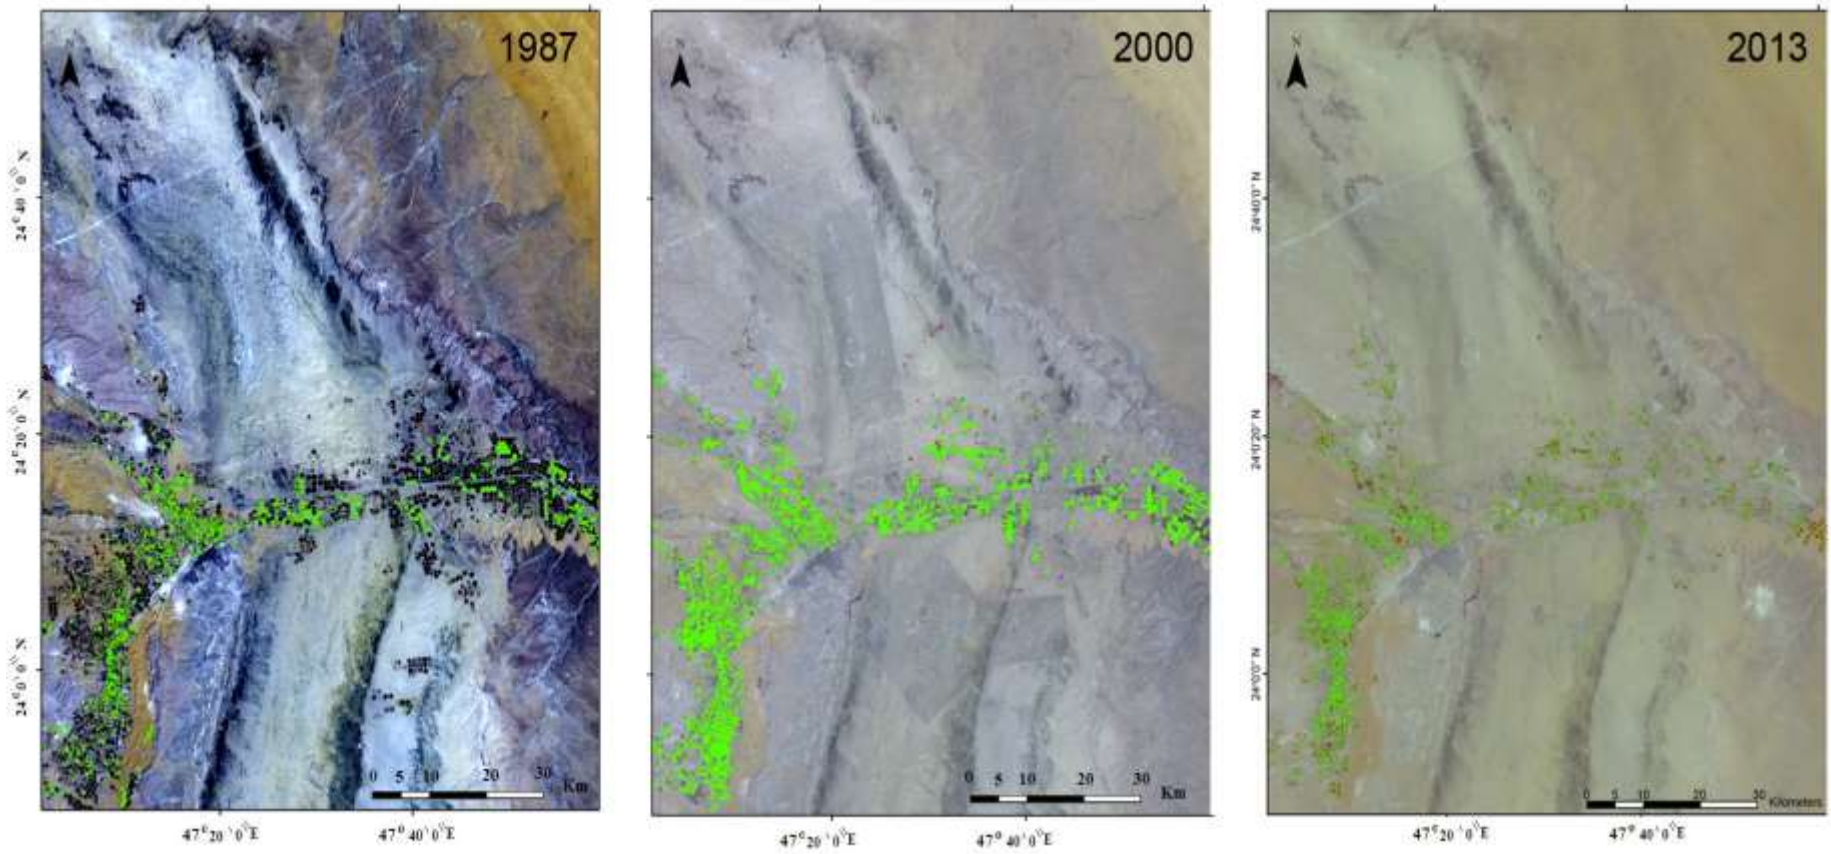

**Figure 4.** Vector layer for classified NDVI over Landsat satellite image 1987, 2000, and 2013 (Green color = cultivated area)

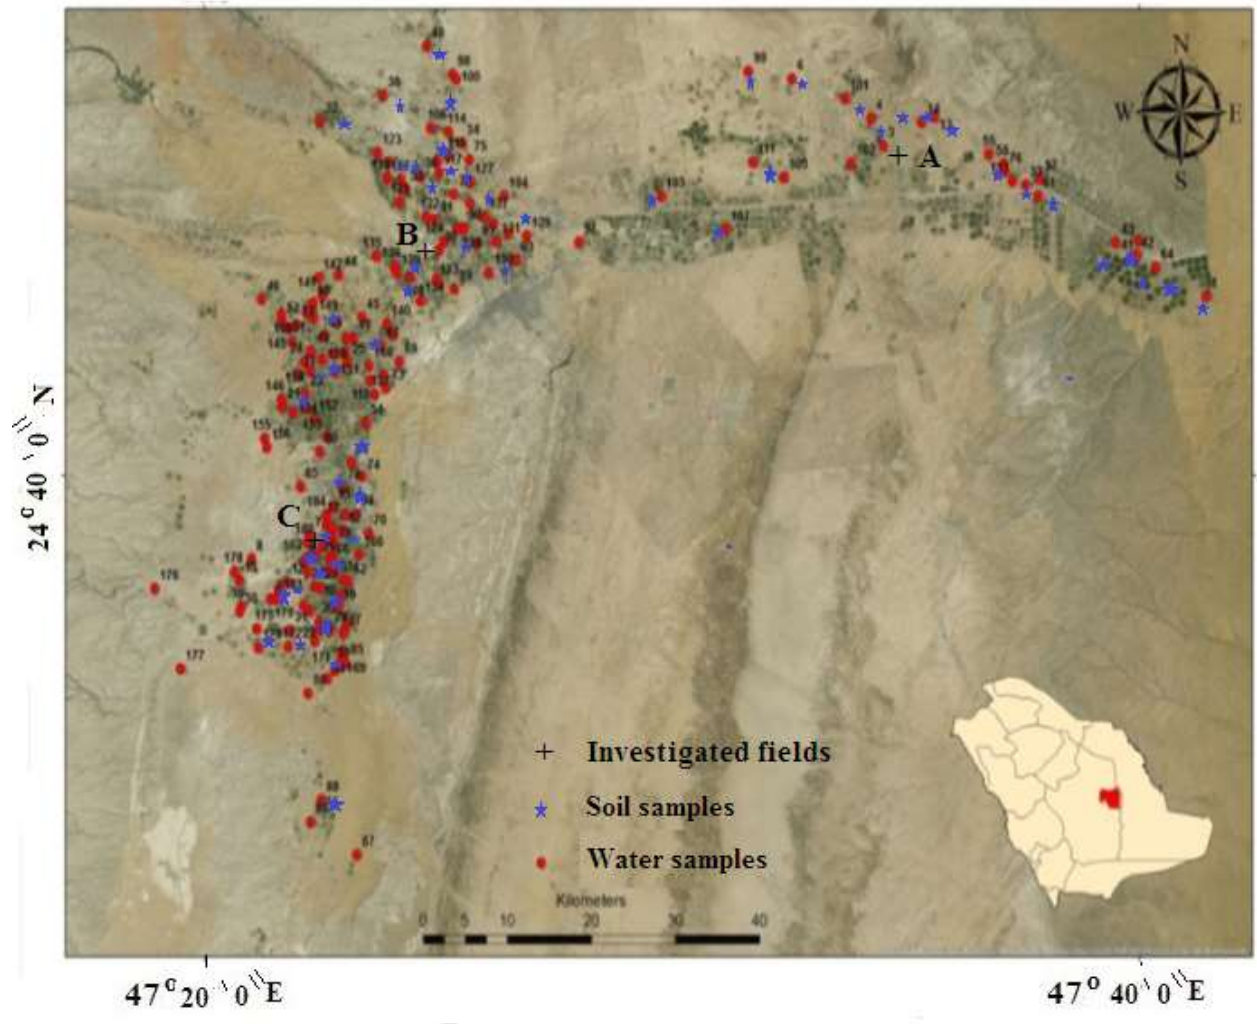

**Figure 5.** Location of the studied groundwater and soil samples, and investigated fields



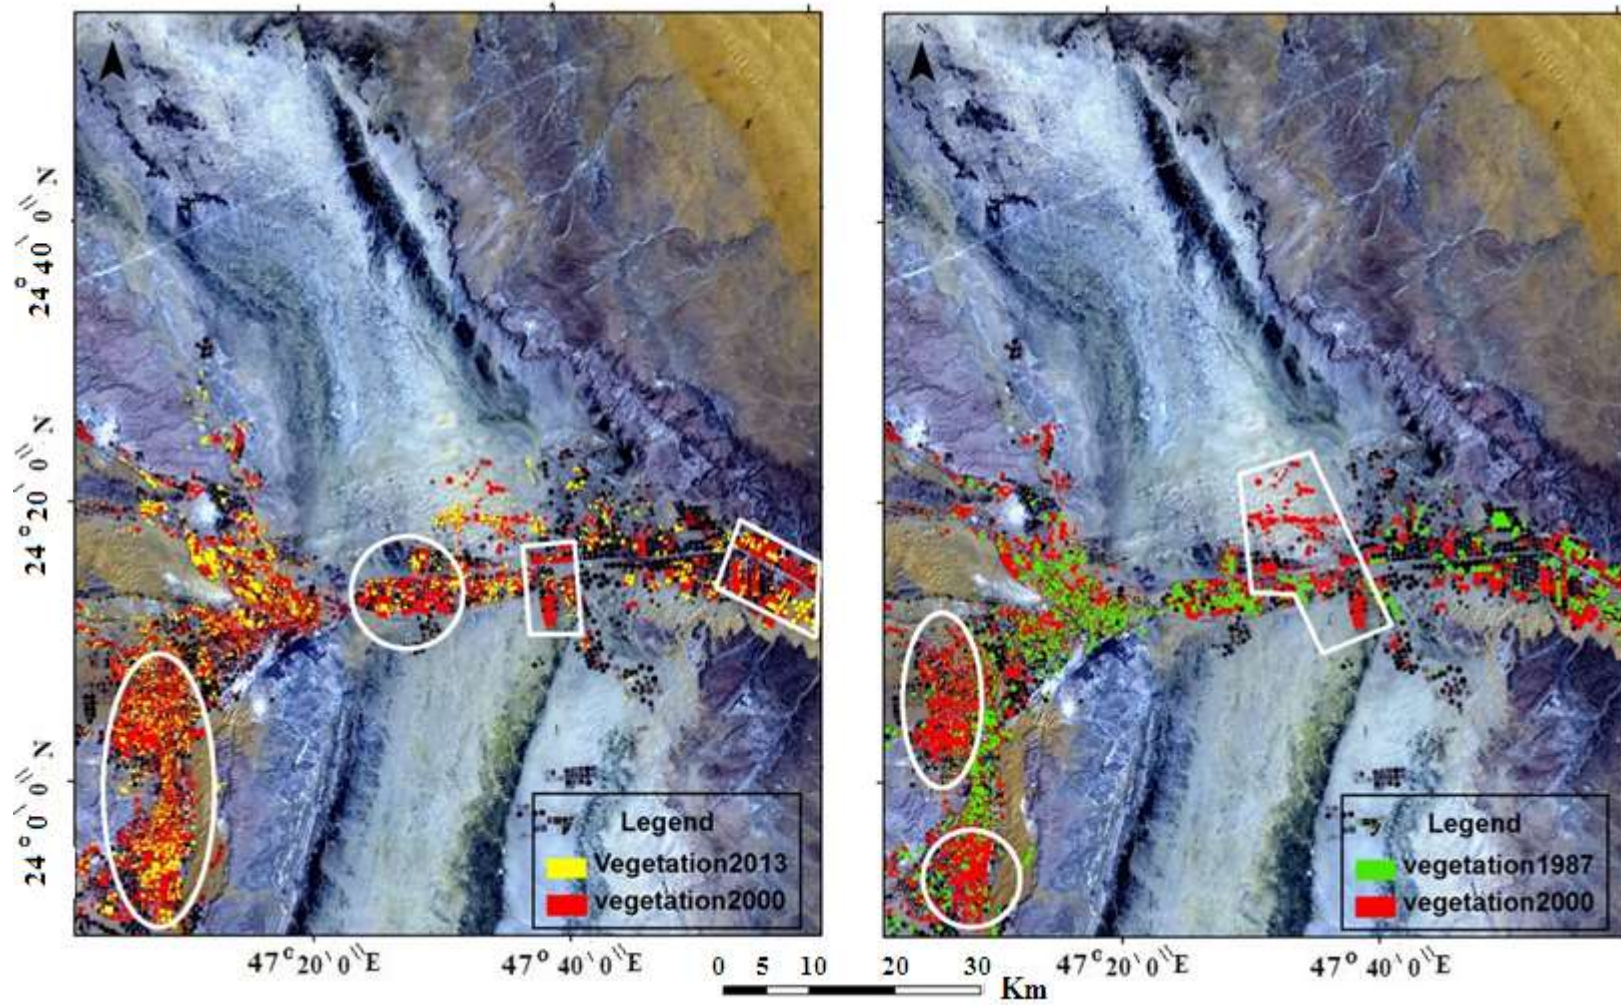

**Figure 6.** Change detection of vegetation cover: An increase observed between (1987 –2000) and a decrease between (2000-2013)

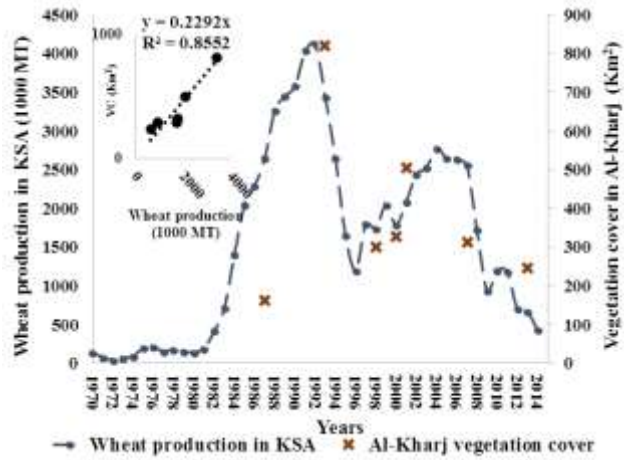

**Figure 7.** The changes of vegetation cover (VC) (km<sup>2</sup>) and wheat production (1000 MT) of the Al-Kharj. The three RS date, 1993, 1998, and 2001, were for Landsat-5 cited by Modaihsh et al. (2015). The 2007 image was for Landsat Thematic Mapper (TM) cited by Algahtani et al. (2015)

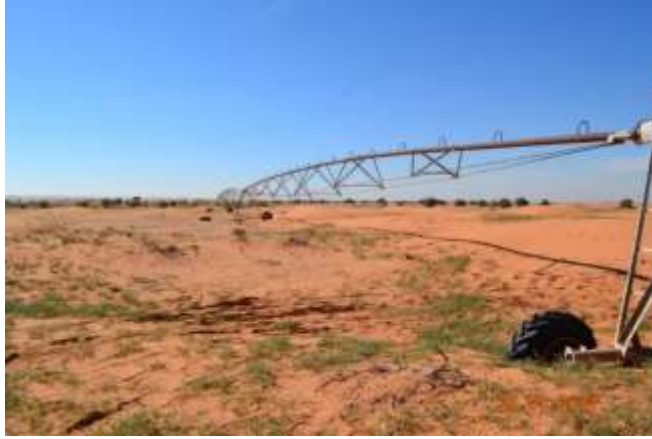

**Figure 8.** Sand dune encroachment in eastern part of Al-Kharj ecosystem

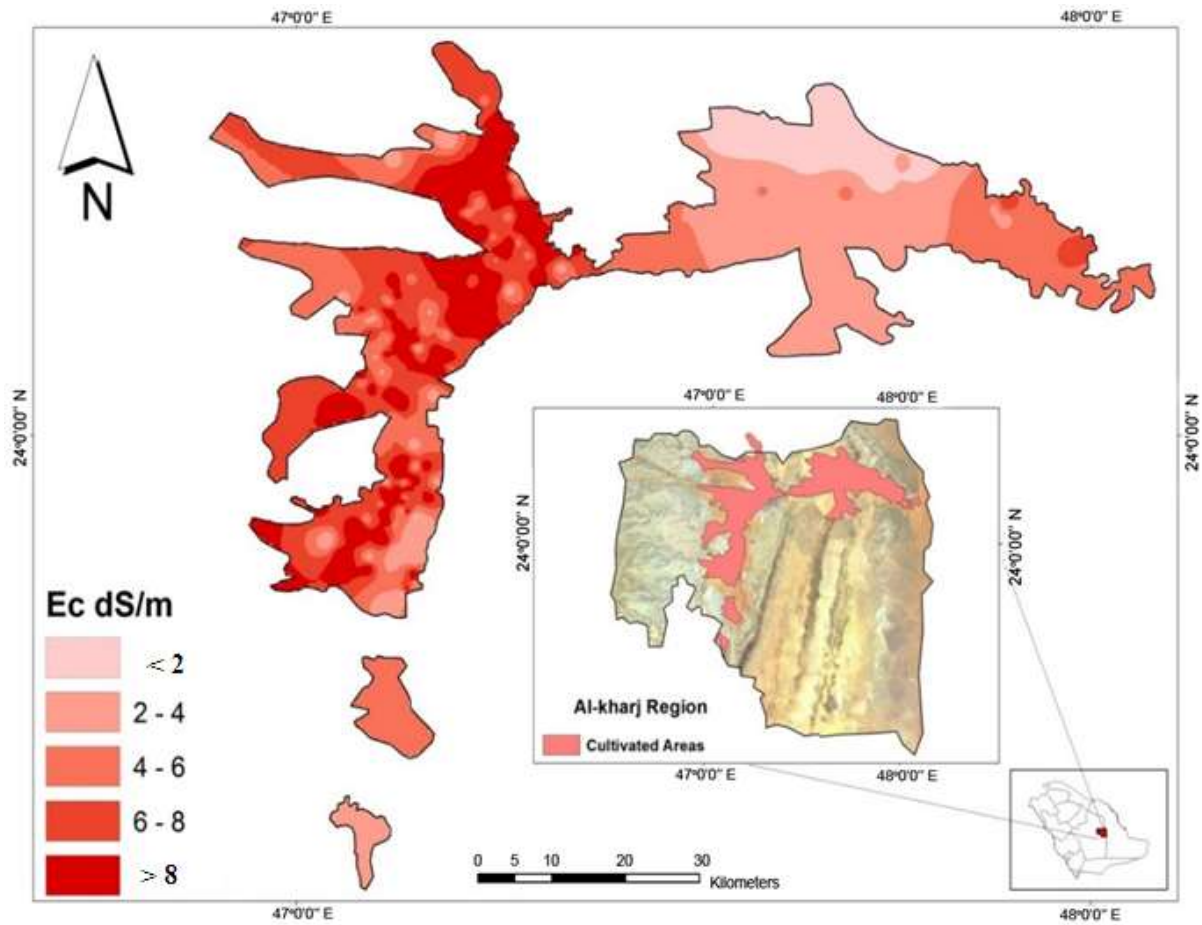

**Figure 9.** Interpolation of groundwater EC



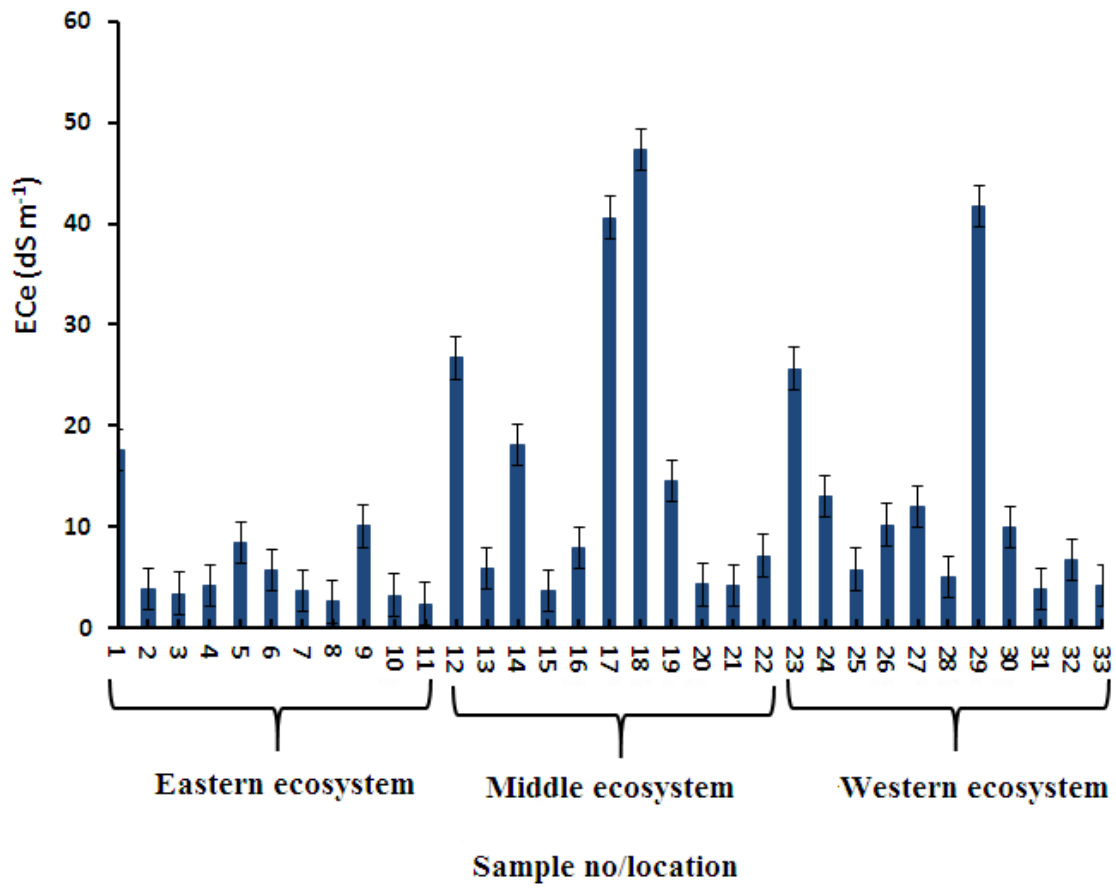

**Figure 10.** Salinity of selected soil samples (n=33)

**Figure 11.** The changes of VC between years 2000 and 2013 linked to soil salinity, water content, and temperature at different fields in Al Kharj ecosystem; A) Field with no change of VC and used fresh water for irrigation ( $EC_w = 1.1 \text{ dS m}^{-1}$ ). B) Deteriorated field used saline brackish water for irrigation ( $EC_w = 6.5 \text{ dS m}^{-1}$ ). C) Abandoned field with no irrigation ( $EC_w = 10.2 \text{ dS m}^{-1}$ ).

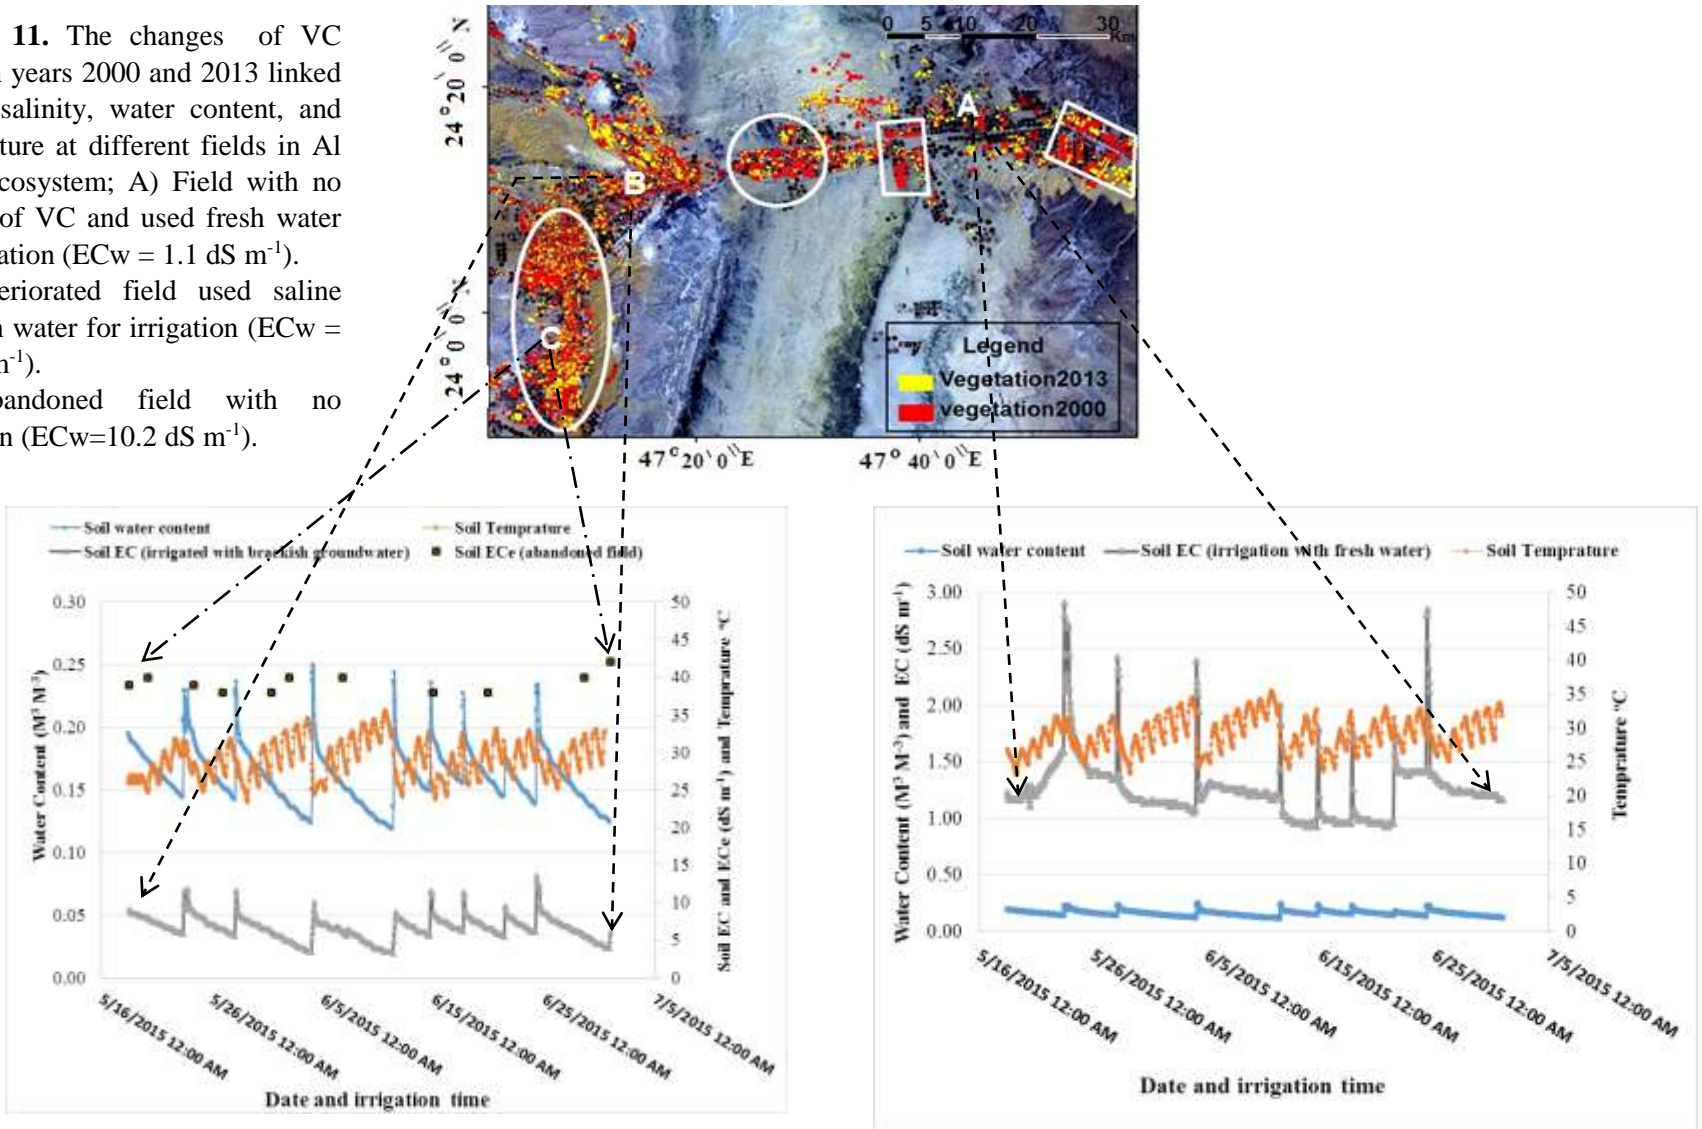

**Table 1.** Spatio-temporal characteristics of Al-Kharj ecosystem

| Reference<br>Year | Classified<br>image | Vegetation cover areas (Km <sup>2</sup> ) |                                 |                         |       |
|-------------------|---------------------|-------------------------------------------|---------------------------------|-------------------------|-------|
|                   |                     | Dense<br>(NDVI > 0.5)                     | Moderate<br>(NDVI = 0.25 – 0.5) | Sparse<br>(NDVI < 0.25) | Total |
| 1987              | Landsat4<br>TM      | 36                                        | 69                              | 58                      | 163   |
| 2000              | Landsat7<br>ETM+    | 8                                         | 156                             | 174                     | 338   |
| 2013              | Landsat8            | 6                                         | 91                              | 148                     | 245   |

**Table 2.** Water and soil deteriorated parameter (salinity) in relation to total VC changes

|                              |                                 | EC <sub>w</sub> |       |      | EC <sub>e</sub> |      |     |
|------------------------------|---------------------------------|-----------------|-------|------|-----------------|------|-----|
|                              |                                 | ≤ 3             | 3 - 4 | 4-10 | ≤ 4             | 4-10 | >10 |
| Eastern Ecosystem            | % of samples                    | 83              | 17    | -    | 76              | 18   | 5   |
|                              | Total VC % decrease (2000-2013) | 18              |       |      |                 |      |     |
| Middle and western Ecosystem | % of samples                    | 64              | 20    | 16   | 19              | 50   | 31  |
|                              | Total VC % decrease (2000-2013) | 33              |       |      |                 |      |     |

**Table 3.** Descriptive statistics of EC (dS/m) of soil (n=50) and water samples (n=180) in ecosystem areas subjected to sand dune encroachment (eastern part) or salinization (middle and western part)

|                      | Soil         |                         | Water        |                         |
|----------------------|--------------|-------------------------|--------------|-------------------------|
|                      | Eastern part | Middle and western part | Eastern part | Middle and western part |
| Max                  | 17.63        | 47.35                   | 3.82         | 10.15                   |
| Min                  | 2.50         | 2.34                    | 1.31         | 1.83                    |
| Mean                 | 3.05         | 12.11                   | 2.50         | 3.22                    |
| Med. <sup>1</sup>    | 2.66         | 7.12                    | 2.54         | 2.73                    |
| St.Dev. <sup>2</sup> | 7.51         | 12.01                   | 0.71         | 1.42                    |

<sup>1</sup> Med. = Median    <sup>2</sup>St.Dev. = Standard deviation

**Table 4.** Statistical analysis of groundwater chemical composition of Al-Kharj (n=180)

|                        | PH    | EC<br>dS m <sup>-1</sup> | Ca <sup>2+</sup> | Mg <sup>2+</sup> | Na <sup>+</sup> | K <sup>+</sup> | Cl <sup>-</sup> | HCO <sub>3</sub> <sup>-</sup> | CO <sub>3</sub> <sup>-2</sup> | SO <sub>4</sub> <sup>-2</sup> | SAR  |
|------------------------|-------|--------------------------|------------------|------------------|-----------------|----------------|-----------------|-------------------------------|-------------------------------|-------------------------------|------|
| Max.                   | 8.60  | 10.15                    | 36.75            | 29.85            | 43.40           | 0.72           | 58.17           | 18.83                         | 4.33                          | 43.19                         | 9.14 |
| Min.                   | 6.78  | 1.05                     | 3.45             | 0.79             | 2.24            | 0.05           | 3.13            | 0.87                          | 0.00                          | 3.22                          | 1.08 |
| Mean                   | 7.72  | 3.00                     | 10.79            | 7.78             | 11.28           | 0.25           | 10.86           | 3.99                          | 0.13                          | 15.03                         | 3.74 |
| St.Dev                 | 0.44  | 1.29                     | 5.09             | 3.93             | 5.96            | 0.10           | 7.32            | 1.49                          | 0.37                          | 7.05                          | 1.47 |
| Vari. <sup>1</sup>     | 0.66  | 1.13                     | 2.26             | 1.98             | 2.44            | 0.31           | 2.71            | 1.22                          | 0.61                          | 2.66                          | 1.21 |
| St. error <sup>2</sup> | 0.18  | 0.23                     | 0.33             | 0.31             | 0.34            | 0.12           | 0.36            | 0.24                          | 0.17                          | 0.36                          | 0.24 |
| Med.                   | 7.72  | 2.64                     | 9.60             | 6.69             | 10.21           | 0.23           | 9.50            | 3.83                          | 0.00                          | 12.83                         | 3.51 |
| Skew. <sup>3</sup>     | -0.15 | 2.47                     | 1.39             | 2.16             | 2.53            | 1.66           | 3.85            | 5.96                          | 8.20                          | 1.18                          | 1.12 |

<sup>1</sup>Vari. = Variance    <sup>2</sup>St. error = Standard error    <sup>3</sup>Skew. = Skewness
